# Supplementary material
Source: Research Square preprint supplement (doi:10.21203/rs.3.rs-9978021/v1)

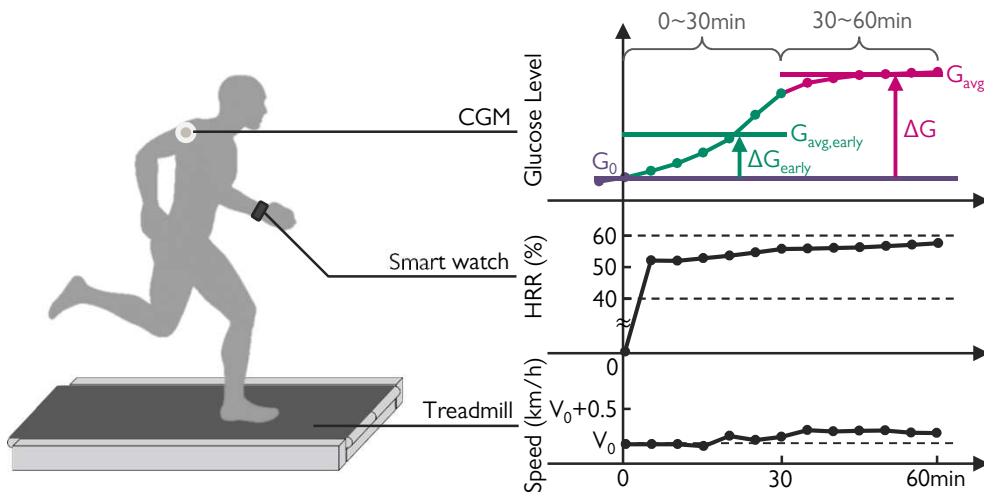

Supplement: Supplementary file 1 [file figure1.pdf › figure1.pdf]

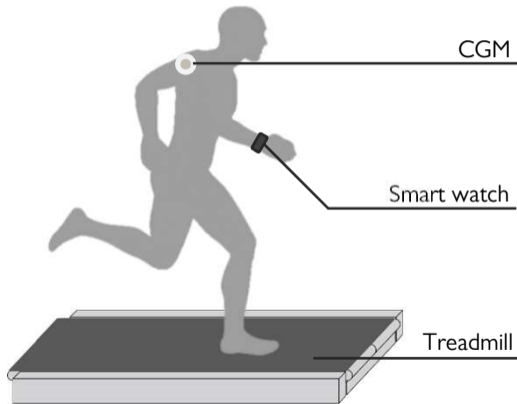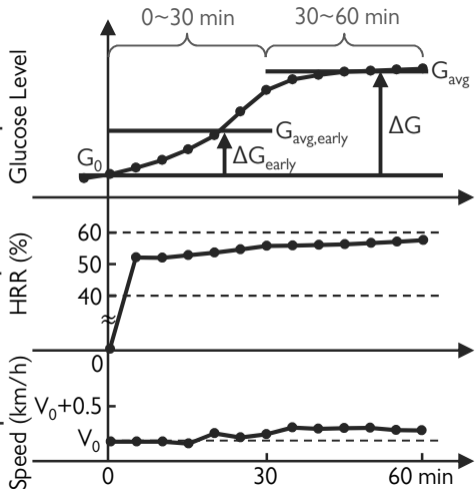

Supplement: Supplementary file 2 [file figure1_cropped_tighter.pdf › figure1_cropped_tighter.pdf]

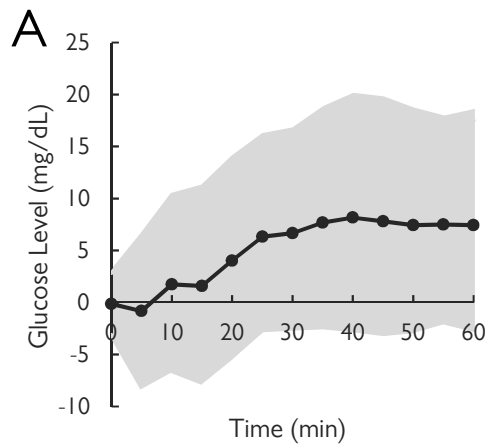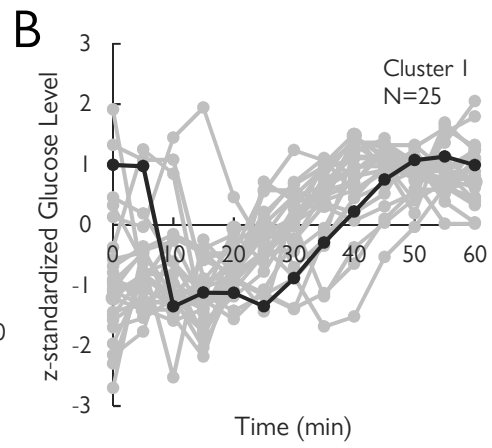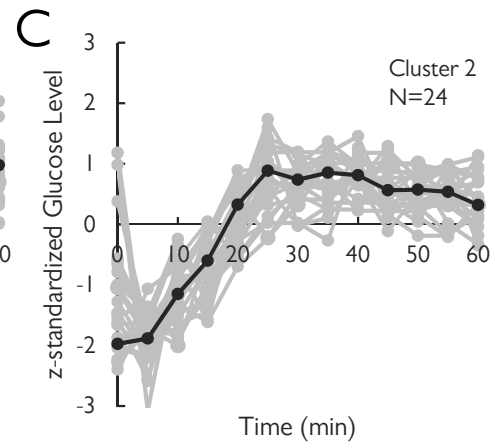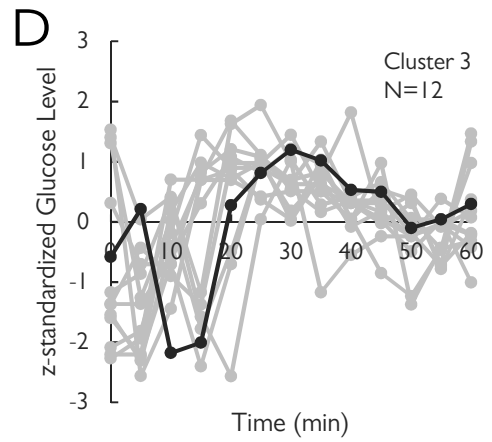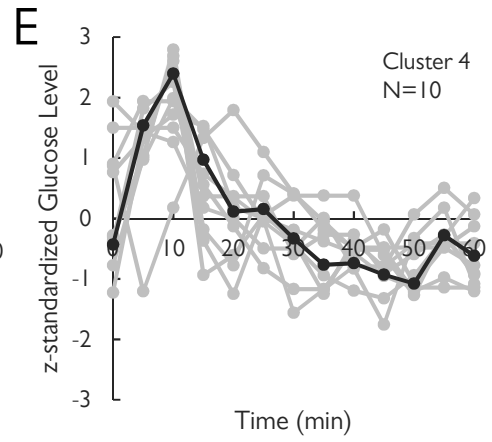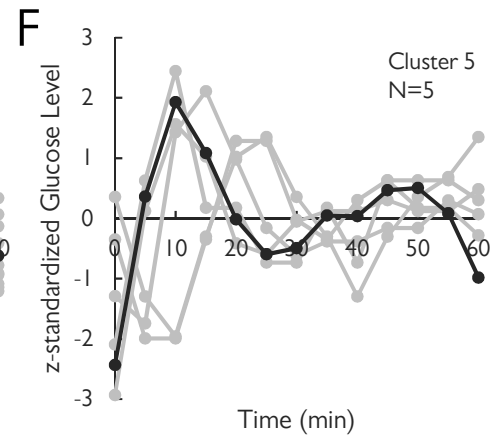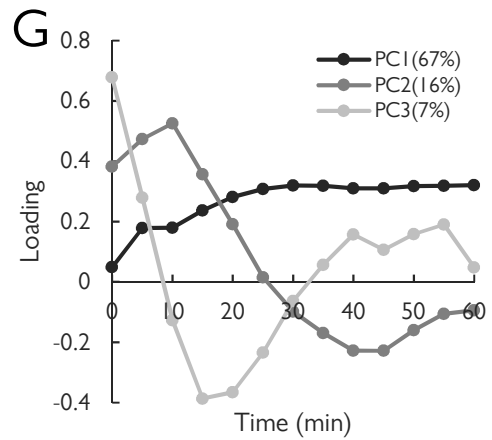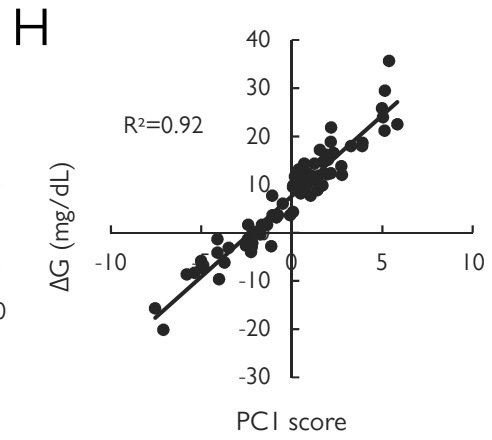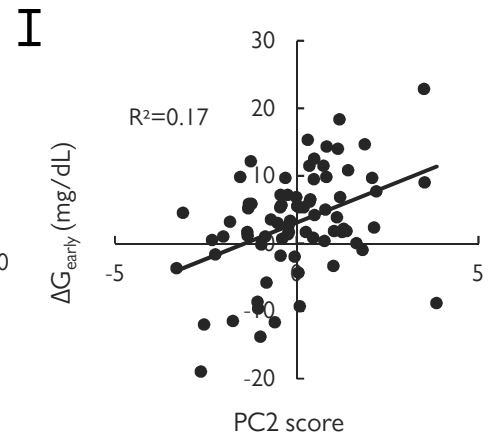

Supplement: Supplementary file 3 [file figure2.pdf › figure2.pdf]

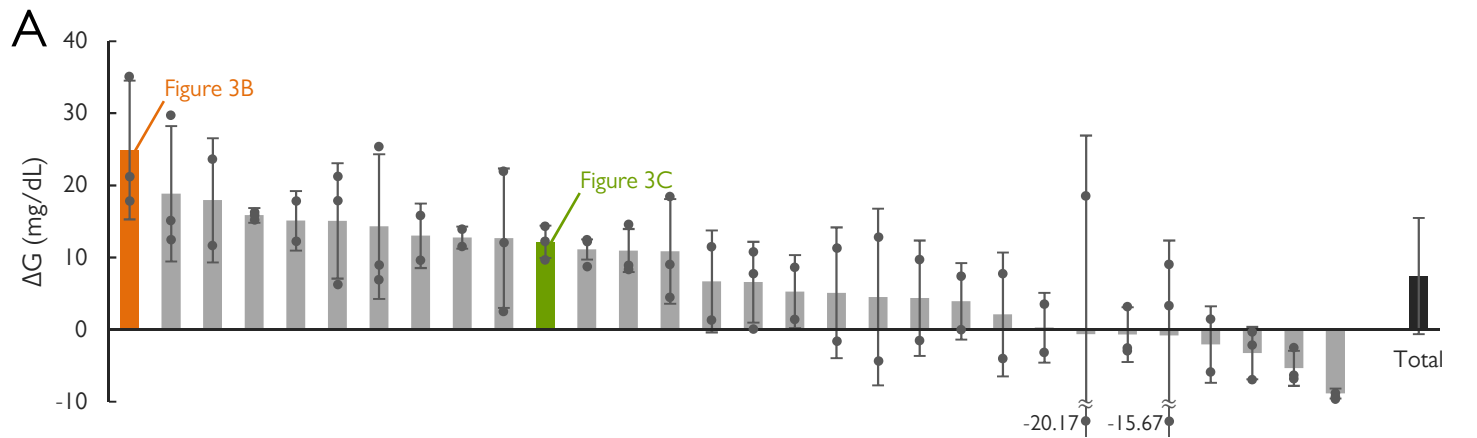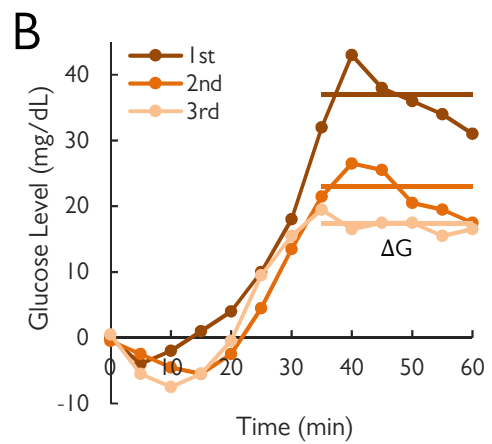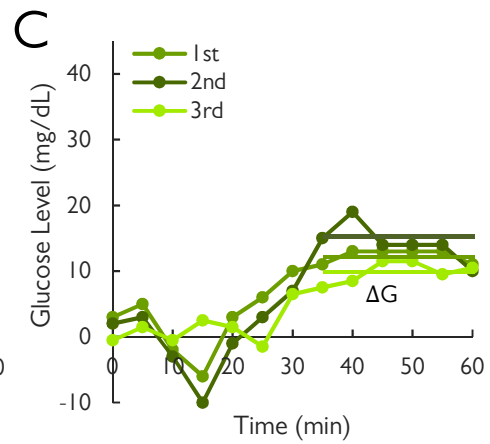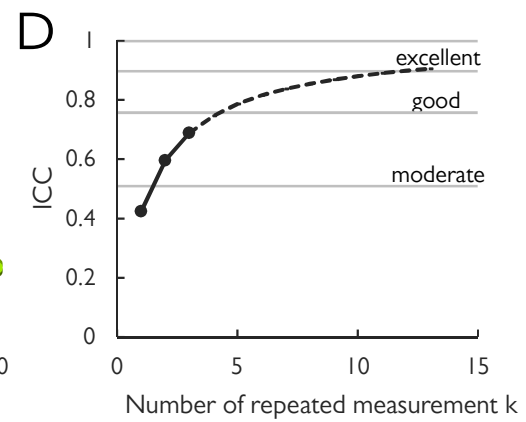

Supplement: Supplementary file 4 [file figure3.pdf › figure3.pdf]

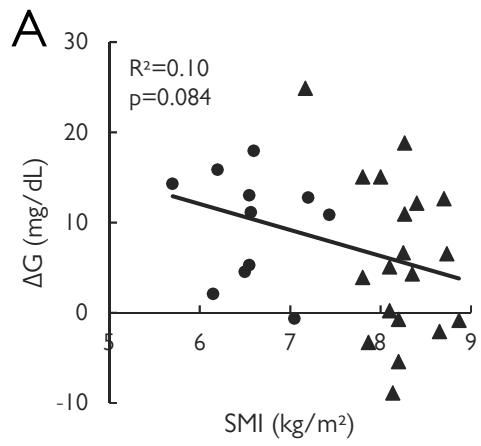

Total (N=30)  
 ▲ Men (N=19) ● Women (N=11)

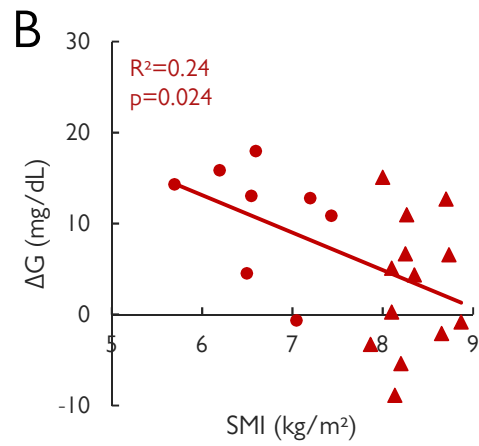

Recreational (N=21)  
 ▲ Men (N=13) ● Women (N=8)

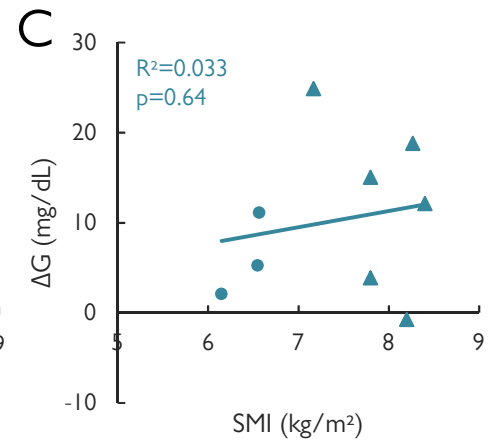

Trained (N=9)  
 ▲ Men (N=6) ● Women (N=3)

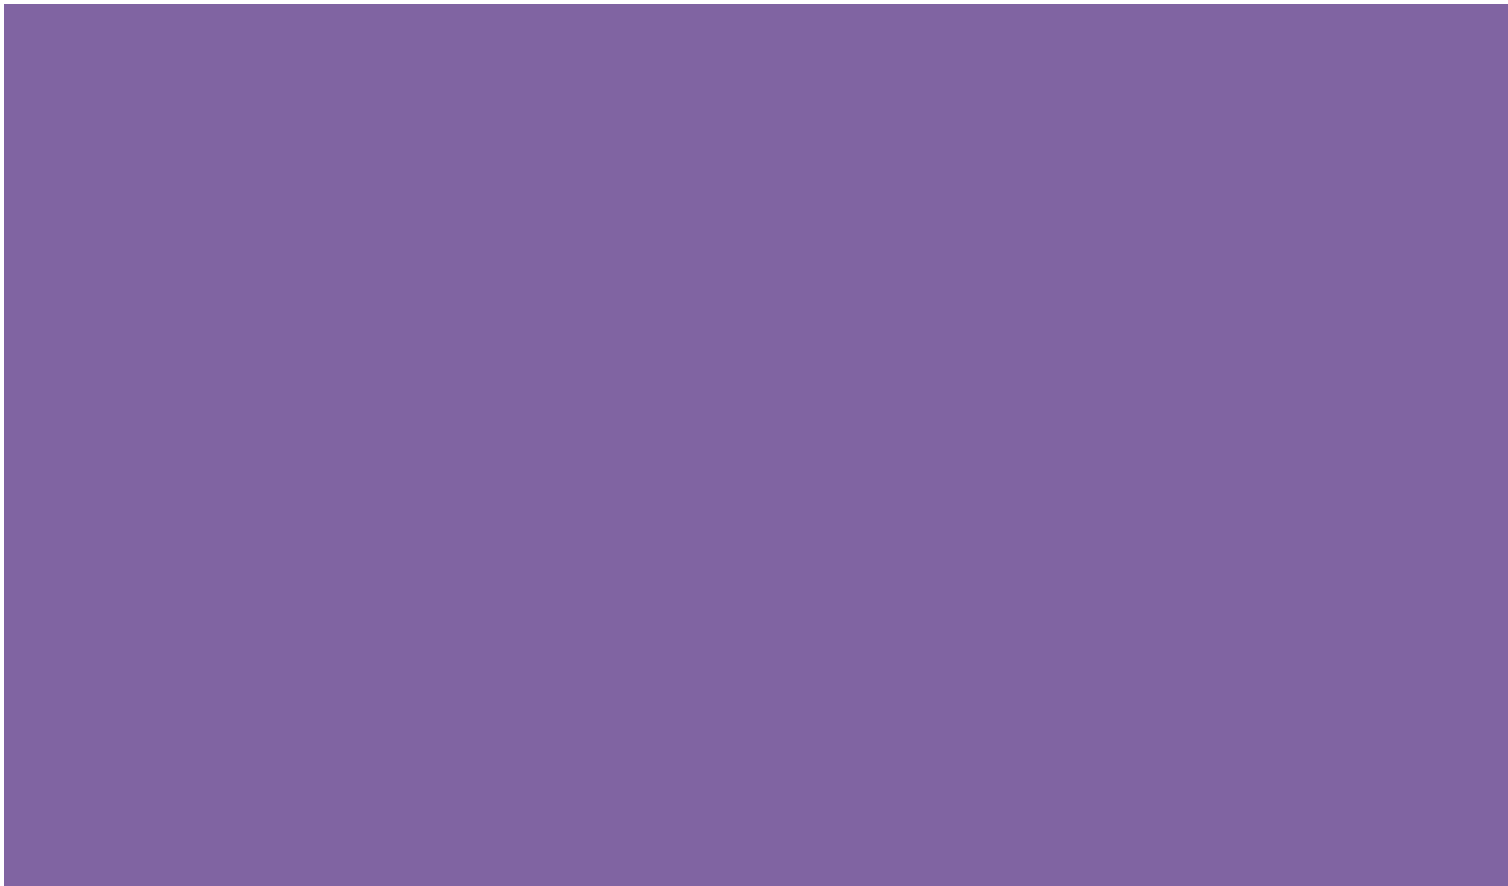

Supplement: Supplementary file 5 [file figure4.pdf › figure4.pdf]

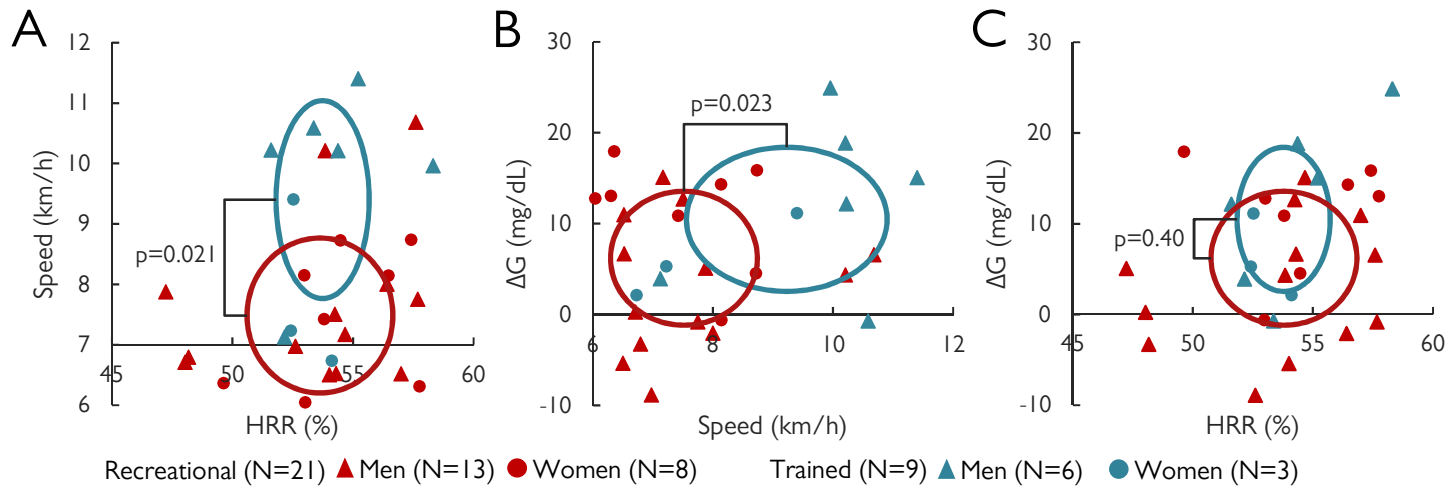

Supplement: Supplementary file 6 [file figure5.pdf › figure5.pdf]
